# Supplementary material for: Decoding the Role of Extracellular Polymeric Substances in Enhancing Nitrogen Removal from High-Ammonia and Low-C/N Wastewater in a Sequencing Batch Packed-Bed Biofilm Reactor
Source: MDPI journal article supplement (doi:10.3390/polym15061510), 2023-03-17
Supplement: s1 [file s1]

## Supplementary Materials

**Table S1.** Parameters of the PU foam.

| Item                  | Unit              | Value              |
|-----------------------|-------------------|--------------------|
| Size                  | cm × cm × cm      | 2.5×2.5×2.5        |
| Specific surface area | m <sup>2</sup> /g | ≥23.3              |
| Weight                | kg/m <sup>3</sup> | 23±0.5             |
| Density               | kg/m <sup>3</sup> | approximately 1000 |
| Porosity              | %                 | ≥95                |
| Stacking density      | n/m <sup>3</sup>  | 8000               |

**Table S2.** Main fluorescence parameters of 3D-EEM under four scenarios (R1-R4).

| EP<br>S        | Scenari<br>o | Peak A    |     | Peak B    |    | Peak C    |    | Peak D    |    | Peak E    |    | Peak F    |     |
|----------------|--------------|-----------|-----|-----------|----|-----------|----|-----------|----|-----------|----|-----------|-----|
|                |              | Ex/E<br>m | FI* | Ex/E<br>m | FI  |
| S-<br>EP<br>S  | R1           | 280/      | 10  | 226/      | 28 | -         | -  | -         | -  | -         | -  | -         | -   |
|                |              | 340       | 2   | 330       | 2  |           |    |           |    |           |    |           |     |
|                | R2           | 284/      | 76  | 226/      | 16 | 230/      | 19 | 294/      | 15 | -         | -  | -         | -   |
|                |              | 320       |     | 330       | 7  | 410       | 8  | 410       | 6  |           |    |           |     |
|                | R3           | 274/      | 11  | 226/      | 29 | -         | -  | -         | -  | -         | -  | -         | -   |
|                |              | 330       | 3   | 330       | 2  |           |    |           |    |           |    |           |     |
|                | R4           | 280/      | 13  | 226/      | 33 | -         | -  | 320/      | 11 | -         | -  | -         | -   |
|                |              | 330       | 3   | 340       | 3  |           |    | 380       | 8  |           |    |           |     |
| LB<br>-E<br>PS | R1           | 282/      | 10  | 226/      | 29 | -         | -  | 336/      |    | -         | -  | -         | -   |
|                |              | 340       | 6   | 340       | 4  |           |    | 410       | 56 |           |    |           |     |
|                | R2           | 282/      | 95  | 226/      | 23 | -         | -  | 336/      | 72 | -         | -  | -         | -   |
|                |              | 330       |     | 330       | 1  |           |    | 410       |    |           |    |           |     |
|                | R3           | 280/      | 12  | 228/      | 29 | -         | -  | -         | -  | -         | -  | -         | -   |
|                |              | 340       | 8   | 345       | 7  |           |    |           |    |           |    |           |     |
|                | R4           | 280/      | 13  | 226/      | 33 | -         | -  | 320/      | 11 | -         | -  | -         | -   |
|                |              | 330       | 3   | 340       | 3  |           |    | 380       | 8  |           |    |           |     |
| TB<br>-E<br>PS | R1           | 284/      | 10  | -         | -  | 210/      | 10 | 310/      | 61 | 208/      | 10 | 208/      | 770 |
|                |              | 365       | 14  |           |    | 425       | 14 | 400       | 1  | 490       | 14 | 530       |     |
|                | R2           | 290/      | 99  | -         | -  | 208/      | 10 | 346/      | 10 | 210/      | 10 | 212/      | 609 |
|                |              | 365       | 5   |           |    | 425       | 16 | 440       | 16 | 490       | 16 | 530       |     |
|                | R3           | 287/      | 10  | -         | -  | 210/      | 10 | 317/      | 10 | 210/      | 10 | 208/      | 101 |
|                |              | 370       | 12  |           |    | 425       | 12 | 395       | 12 | 490       | 12 | 530       | 2   |
|                | R4           | 278/      | 97  | -         | -  | 208/      | 97 | 320/      | 97 | 212/      | 86 | 208/      | 524 |
|                |              | 354       | 4   |           |    | 425       | 4  | 385       | 4  | 490       | 1  | 530       |     |

\* Fluorescence intensity of the peak.

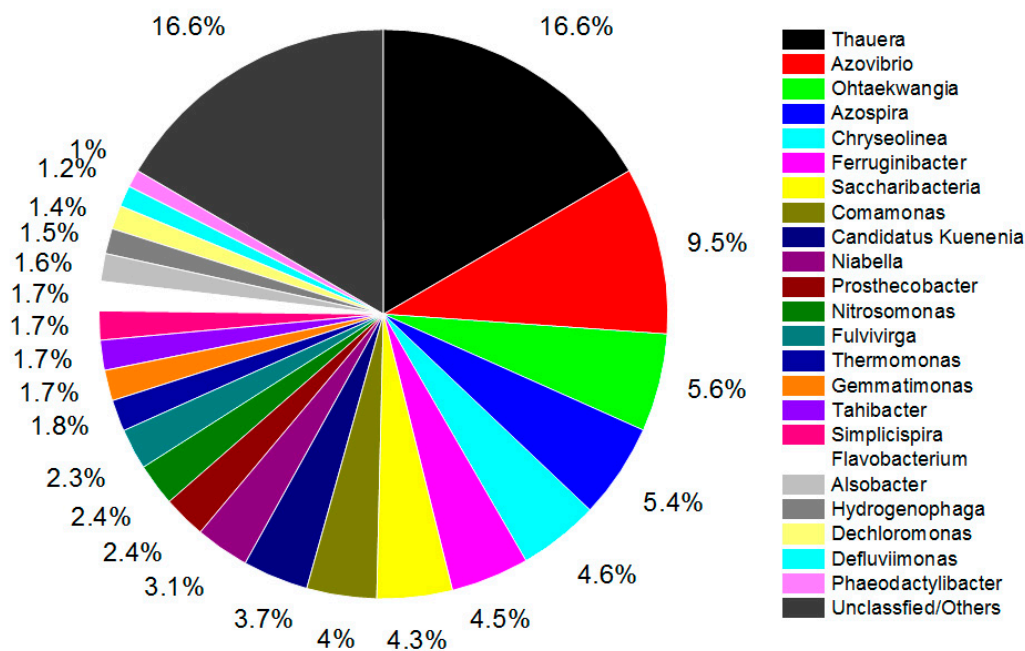

**Figure S1.** Microbial community at genus level (in R3) based on high-throughput sequencing analysis
